# Supplementary material
Source: HighWire-hosted journal article supplement (https://erj.ersjournals.com/content/56/2/1902216)
Supplement: inline-supplementary-material-3 [file inline-supplementary-material-3.pdf]

## Appendix

### Key statistical tests used (Mock v RSV) using GraphPad Prism

| <b>Figure</b> | <b>Array 1</b> | <b>Array 2</b> | <b>N</b> | <b>Test used</b>         | <b>P value</b>    | <b>95% Confidence interval</b> |
|---------------|----------------|----------------|----------|--------------------------|-------------------|--------------------------------|
| <b>2A</b>     | Mock 1h        | RSV 1h         | 6        | One tailed paired T Test | <b>0.0356</b>     | -2782 to 47120                 |
| <b>2A</b>     | Mock 4h        | RSV 4h         | 6        | One tailed paired T Test | 0.0507            | -                              |
| <b>2B</b>     | Mock 1h        | RSV 1h         | 6        | One tailed paired T Test | <b>0.0034</b>     | -3332 to 69622                 |
| <b>2B</b>     | Mock 4h        | RSV 4h         | 6        | One tailed paired T Test | <b>0.0009</b>     | 51869 to 129873                |
| <b>2C</b>     | Mock 1h        | RSV 1h         | 15       | One tailed paired T Test | <b>&lt;0.0001</b> | -1374 to -704.2                |
| <b>2C</b>     | Mock 4h        | RSV 4h         | 15       | One tailed paired T Test | <b>0.0011</b>     | 194.6 to 712.8                 |
| <b>2D</b>     | Mock 1h        | RSV 1h         | 15       | One tailed paired T Test | <b>&lt;0.0001</b> | -2328 to -1198                 |
| <b>2D</b>     | Mock 4h        | RSV 4h         | 15       | One tailed paired T Test | <b>0.0052</b>     | 164.7 to 1037                  |
| <b>3B</b>     | Mock 1h        | RSV 1h         | 15       | One tailed paired T Test | 0.1418            | -                              |
| <b>3B</b>     | Mock 4h        | RSV 4h         | 15       | One tailed paired T Test | <b>&lt;0.0001</b> | -13.19 to -5.252               |
| <b>3C</b>     | Mock 1h        | RSV 1h         | 15       | One tailed paired T Test | 0.0507            | -126.2 to 1256                 |
| <b>3C</b>     | Mock 4h        | RSV 4h         | 15       | One tailed paired T Test | <b>&lt;0.0001</b> | 1102 to 2741                   |
| <b>3D</b>     | Mock 1h        | RSV 1h         | 4        | One tailed paired T Test | 0.4575            | -                              |
| <b>3D</b>     | Mock 4h        | RSV 4h         | 4        | One tailed paired T Test | <b>0.0177</b>     | -0.3163 to -0.02174            |
| <b>4A</b>     | Mock 1h        | RSV 1h         | 4        | One tailed paired T Test | <b>0.0052</b>     | -0.324 to -0.09367             |
| <b>4A</b>     | Mock 4h        | RSV 4h         | 4        | One tailed paired T Test | <b>0.0241</b>     | -2.187 to -0.01673             |
| <b>4B</b>     | Mock 1h        | RSV 1h         | 4        | One tailed paired T Test | 0.1654            | -                              |
| <b>4B</b>     | Mock 4h        | RSV 4h         | 4        | One tailed paired T Test | <b>0.0394</b>     | -2.986 to 0.2875               |
| <b>4C</b>     | Mock 1h        | RSV 1h         | 4        | One tailed paired T Test | <b>0.0006</b>     | -0.00315 to -0.00185           |
| <b>4C</b>     | Mock 4h        | RSV 4h         | 4        | One tailed paired T Test | 0.4035            | -                              |
| <b>4D</b>     | Mock 1h        | RSV 1h         | 4        | One tailed paired T Test | 0.0776            | -                              |
| <b>4D</b>     | Mock 4h        | RSV 4h         | 4        | One tailed paired T Test | 0.0610            | -                              |
| <b>4E</b>     | RSV NM         | RSV M          | 3        | One tailed paired T Test | 0.071             | -                              |
| <b>4E</b>     | ASM NM         | ASM M          | 3        | One tailed paired T Test | 0.078             | -                              |
| <b>4F</b>     | RSV            | RSV+N          | 9        | One tailed paired T Test | <b>0.0263</b>     | -55458 to 400.7                |
| <b>4G</b>     | RSV            | RSV+N          | 10       | One tailed paired T Test | 0.4124            | -                              |

**Key statistical tests used (RSV + RSV LFA1) using GraphPad Prism**

| <b>Figure</b> | <b>Array 1</b> | <b>Array 2</b> | <b>N</b> | <b>Test used</b>                         | <b>P value</b>    | <b>95% Confidence interval</b> |
|---------------|----------------|----------------|----------|------------------------------------------|-------------------|--------------------------------|
| <b>5A</b>     | Mock 1h        | RSV 1h         | 15       | Two way ANOVA with Bonferroni correction | <b>&lt;0.0001</b> | -2458 to -1068                 |
| <b>5A</b>     | RSV 1h         | RSV+LFA 1h     | 15       |                                          | <b>&lt;0.0001</b> | 1125 to 2515                   |
| <b>5A</b>     | Mock 4h        | RSV 4h         | 15       | Two way ANOVA with Bonferroni correction | 0.1081            | -                              |
| <b>5A</b>     | RSV 4h         | RSV+LFA 4h     | 15       |                                          | <b>0.0091</b>     | -1581 to -191.4                |
| <b>5B</b>     | RSV 1h         | RSV+LFA 1h     | 4        | Two way ANOVA with Bonferroni correction | 0.878             | -                              |
| <b>5B</b>     | RSV 4h         | RSV+LFA 4h     | 4        |                                          | >0.99             | -                              |
| <b>5D</b>     | Mock 4h        | RSV 4h         | 15       | Two way ANOVA with Bonferroni correction | <b>0.0048</b>     | 521.7 to 3322                  |
| <b>5D</b>     | RSV 4h         | RSV+LFA 4h     | 15       |                                          | <b>0.0323</b>     | -2902 to -101.9                |
| <b>5E</b>     | Mock 4h        | RSV 4h         | 15       | Two way ANOVA with Bonferroni correction | <b>0.0002</b>     | -14.34 to -4.232               |
| <b>5E</b>     | RSV 4h         | RSV+LFA 4h     | 15       |                                          | <b>0.0014</b>     | 2.832 to 12.94                 |
| <b>5G</b>     | RSN+N          | RSV+N+LFA      | 9        | Wilcoxon matched-pairs signed rank test  | 0.9102            | -                              |

## Statistical modelling using STATA

To validate our statistical tests were appropriate we carried out further analysis of the neutrophil adherence data using STATA. The results of this analysis are shown below:

Linear mixed models, allowing for clustering by donor, ratio scale

Histogram Adherence at 1 hour - ratio scale (not normally distributed)

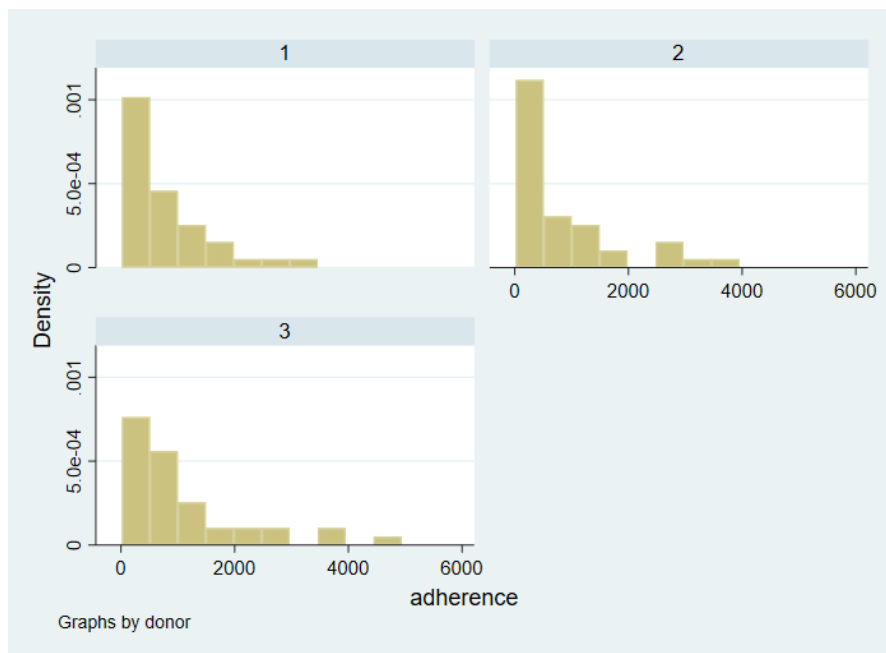

Linear mixed models, allowing for clustering by donor, log scale

Histogram Adherence at 1 hour - log scale (normally distributed)

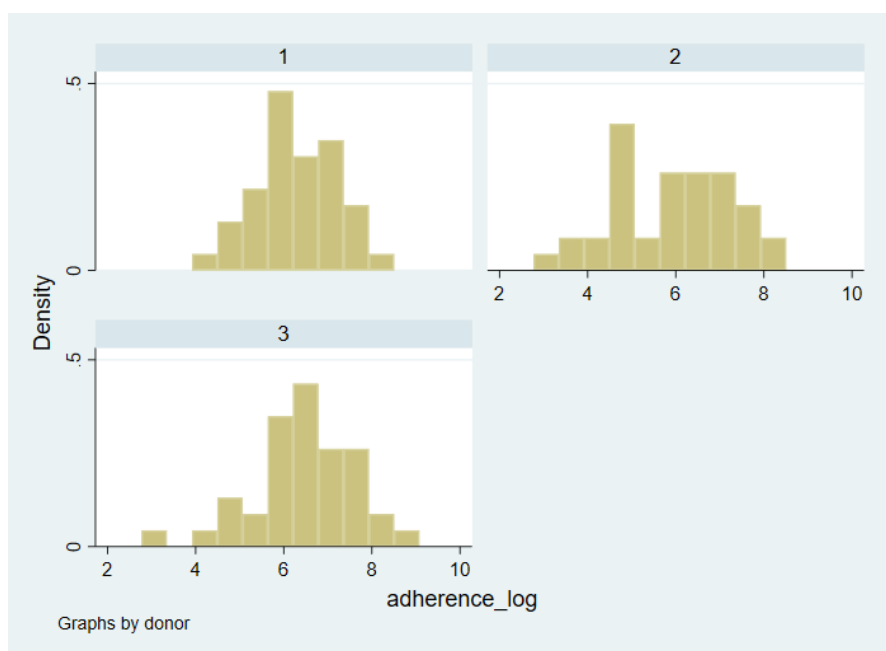

# T test of normally distributed data

| <i>adherence_~<br/>g</i> | <i>Coef.</i> | <i>Std. Err.</i> | <i>z</i>    | <i>P&gt;z</i> | <i>[95%<br/>Conf.</i> | <i>Interval]</i> |
|--------------------------|--------------|------------------|-------------|---------------|-----------------------|------------------|
| <i>type_n</i>            |              |                  |             |               |                       |                  |
| <i>M_R</i>               | 0.190656     | 0.278341         | 0.68        | 0.493         | -0.35488              | 0.736193         |
| <i>RSV</i>               | 1.114467     | 0.278341         | 4.00        | 0.000         | 0.56893               | 1.660005         |
| <i>fMLP</i>              | -1.07402     | 0.278341         | -3.86       | 0.000         | -1.61955              | -0.52848         |
| <i>_cons</i>             | 6.669411     | 0.19814          | 33.66       | 0.000         | 6.281063              | 7.057759         |
| <i>sigma_u</i>           | 0.039606     |                  |             |               |                       |                  |
| <i>sigma_e</i>           | 0.762267     |                  |             |               |                       |                  |
| <i>rho</i>               | 0.002692     | (fraction        | of variance | to u_i)       |                       |                  |
|                          |              | due              |             |               |                       |                  |
